# Supplementary material for: HSICCR: A Lightweight Scoring Criterion Based on Measuring the Degree of Causality for the Detection of SNP Interactions
Source: MDPI journal article supplement (doi:10.3390/math10214134), 2022-11-05
Supplement: s1 [file s1]

## Supplementary Files

### HSICCR:a lightweight scoring criterion based on measuring the degree of causality for the detection of SNP interactions

Junxi Zheng, Juan Zeng , Xinyang Wang , Gang Li , Jiaxian Zhu ,

Fanghong Wang and Deyu Tang

**Table S1.** Model with marginal effects when k=2.

|                                                     |       |       |       |
|-----------------------------------------------------|-------|-------|-------|
| <i>MAF</i> = 0.1, Prevalence = 0.050, $h^2$ = 0.031 |       |       |       |
| Model 1                                             | AA    | Aa    | aa    |
| BB                                                  | 0.060 | 0.010 | 0.010 |
| Bb                                                  | 0.010 | 0.208 | 0.208 |
| bb                                                  | 0.010 | 0.208 | 0.208 |
| <i>MAF</i> = 0.1, Prevalence = 0.050, $h^2$ = 0.014 |       |       |       |
| Model 2                                             | AA    | Aa    | aa    |
| BB                                                  | 0.061 | 0.017 | 0.017 |
| Bb                                                  | 0.017 | 0.136 | 0.136 |
| bb                                                  | 0.017 | 0.136 | 0.136 |
| <i>MAF</i> = 0.1, Prevalence = 0.050, $h^2$ = 0.01  |       |       |       |
| Model 3                                             | AA    | Aa    | aa    |
| BB                                                  | 0.060 | 0.021 | 0.021 |
| Bb                                                  | 0.021 | 0.116 | 0.116 |
| bb                                                  | 0.021 | 0.116 | 0.116 |
| <i>MAF</i> = 0.1, Prevalence = 0.046, $h^2$ = 0.016 |       |       |       |
| Model 4                                             | AA    | Aa    | aa    |
| BB                                                  | 0.030 | 0.090 | 0.070 |
| Bb                                                  | 0.080 | 0.010 | 0.040 |
| bb                                                  | 0.090 | 0.010 | 0.000 |
| <i>MAF</i> = 0.1, Prevalence = 0.026, $h^2$ = 0.009 |       |       |       |
| Model 5                                             | AA    | Aa    | aa    |
| BB                                                  | 0.030 | 0.010 | 0.020 |
| Bb                                                  | 0.010 | 0.090 | 0.050 |
| bb                                                  | 0.020 | 0.050 | 0.070 |
| <i>MAF</i> = 0.1, Prevalence = 0.017, $h^2$ = 0.008 |       |       |       |
| Model 6                                             | AA    | Aa    | aa    |
| BB                                                  | 0.020 | 0.007 | 0.003 |
| Bb                                                  | 0.005 | 0.070 | 0.080 |
| bb                                                  | 0.020 | 0.001 | 0.090 |

**Table S2.** Models 1 to 10 without marginal effects when k=2 .

| $h^2 = 0.2, MAF = 0.2$ |       |       |       | $h^2 = 0.2, MAF = 0.4$ |       |       |       |
|------------------------|-------|-------|-------|------------------------|-------|-------|-------|
| Model 1                | AA    | Aa    | aa    | Model 6                | AA    | Aa    | aa    |
| BB                     | 0.428 | 0.757 | 0.812 | BB                     | 0.356 | 0.891 | 0.809 |
| Bb                     | 0.788 | 0.132 | 0.044 | Bb                     | 0.955 | 0.508 | 0.611 |
| bb                     | 0.559 | 0.548 | 0.373 | bb                     | 0.617 | 0.755 | 0.63  |
| $h^2 = 0.2, MAF = 0.2$ |       |       |       | $h^2 = 0.2, MAF = 0.4$ |       |       |       |
| Model 2                | AA    | Aa    | aa    | Model 7                | AA    | Aa    | aa    |
| BB                     | 0.507 | 0.842 | 0.605 | BB                     | 0.086 | 0.536 | 0.641 |
| Bb                     | 0.845 | 0.162 | 0.629 | Bb                     | 0.677 | 0.275 | 0.096 |
| bb                     | 0.581 | 0.678 | 0.729 | bb                     | 0.219 | 0.413 | 0.712 |
| $h^2 = 0.2, MAF = 0.2$ |       |       |       | $h^2 = 0.2, MAF = 0.4$ |       |       |       |
| Model 3                | AA    | Aa    | aa    | Model 8                | AA    | Aa    | aa    |
| BB                     | 0.577 | 0.247 | 0.428 | BB                     | 0.855 | 0.339 | 0.772 |
| Bb                     | 0.227 | 0.928 | 0.578 | Bb                     | 0.513 | 0.651 | 0.607 |
| bb                     | 0.586 | 0.262 | 0.158 | bb                     | 0.25  | 0.999 | 0.154 |
| $h^2 = 0.2, MAF = 0.2$ |       |       |       | $h^2 = 0.2, MAF = 0.4$ |       |       |       |
| Model 4                | AA    | Aa    | aa    | Model 9                | AA    | Aa    | aa    |
| BB                     | 0.340 | 0.637 | 0.654 | BB                     | 0.506 | 0.838 | 0.024 |
| Bb                     | 0.689 | 0.017 | 0.041 | Bb                     | 0.603 | 0.454 | 0.957 |
| bb                     | 0.242 | 0.866 | 0.403 | bb                     | 0.729 | 0.427 | 0.753 |
| $h^2 = 0.2, MAF = 0.2$ |       |       |       | $h^2 = 0.2, MAF = 0.4$ |       |       |       |
| Model 5                | AA    | Aa    | aa    | Model 10               | AA    | Aa    | aa    |
| BB                     | 0.387 | 0.726 | 0.734 | BB                     | 0.393 | 0.764 | 0.664 |
| Bb                     | 0.749 | 0.090 | 0.034 | Bb                     | 0.850 | 0.398 | 0.733 |
| bb                     | 0.551 | 0.401 | 0.724 | bb                     | 0.406 | 0.927 | 0.147 |

**Table S3.** Models 11 to 20 without marginal effects when k=2.

| $h^2 = 0.1, MAF = 0.2$ |       |       |       | $h^2 = 0.1, MAF = 0.4$ |       |       |       |
|------------------------|-------|-------|-------|------------------------|-------|-------|-------|
| Model 11               | AA    | Aa    | aa    | Model 16               | AA    | Aa    | aa    |
| BB                     | 0.463 | 0.703 | 0.431 | BB                     | 0.137 | 0.484 | 0.187 |
| Bb                     | 0.653 | 0.277 | 0.806 | Bb                     | 0.482 | 0.166 | 0.365 |
| bb                     | 0.830 | 0.008 | 0.129 | bb                     | 0.193 | 0.361 | 0.430 |
| $h^2 = 0.1, MAF = 0.2$ |       |       |       | $h^2 = 0.1, MAF = 0.4$ |       |       |       |
| Model 12               | AA    | Aa    | aa    | Model 17               | AA    | Aa    | aa    |
| BB                     | 0.319 | 0.507 | 0.569 | BB                     | 0.469 | 0.198 | 0.754 |
| Bb                     | 0.553 | 0.105 | 0.045 | Bb                     | 0.337 | 0.502 | 0.141 |
| bb                     | 0.203 | 0.777 | 0.280 | bb                     | 0.339 | 0.453 | 0.285 |
| $h^2 = 0.1, MAF = 0.2$ |       |       |       | $h^2 = 0.1, MAF = 0.4$ |       |       |       |
| Model 13               | AA    | Aa    | aa    | Model 18               | AA    | Aa    | aa    |
| BB                     | 0.627 | 0.393 | 0.335 | BB                     | 0.478 | 0.311 | 0.864 |
| Bb                     | 0.396 | 0.779 | 0.953 | Bb                     | 0.387 | 0.579 | 0.263 |
| bb                     | 0.174 | 0.842 | 0.106 | bb                     | 0.634 | 0.436 | 0.138 |
| $h^2 = 0.1, MAF = 0.2$ |       |       |       | $h^2 = 0.1, MAF = 0.4$ |       |       |       |
| Model 14               | AA    | Aa    | aa    | Model 19               | AA    | Aa    | aa    |
| BB                     | 0.297 | 0.54  | 0.441 | BB                     | 0.068 | 0.299 | 0.017 |
| Bb                     | 0.541 | 0.072 | 0.278 | Bb                     | 0.289 | 0.044 | 0.285 |
| bb                     | 0.434 | 0.293 | 0.228 | bb                     | 0.048 | 0.262 | 0.174 |
| $h^2 = 0.1, MAF = 0.2$ |       |       |       | $h^2 = 0.1, MAF = 0.4$ |       |       |       |
| Model 15               | AA    | Aa    | aa    | Model 20               | AA    | Aa    | aa    |
| BB                     | 0.332 | 0.562 | 0.573 | BB                     | 0.539 | 0.120 | 0.258 |
| Bb                     | 0.583 | 0.112 | 0.147 | Bb                     | 0.165 | 0.378 | 0.325 |
| bb                     | 0.399 | 0.496 | 0.033 | bb                     | 0.123 | 0.426 | 0.276 |

**Table S4.** Models 21 to 30 without marginal effects when k=2

| $h^2 = 0.05, MAF = 0.2$ |       |       |       | $h^2 = 0.05, MAF = 0.4$ |       |       |       |
|-------------------------|-------|-------|-------|-------------------------|-------|-------|-------|
| Model 21                | AA    | Aa    | aa    | Model 26                | AA    | Aa    | aa    |
| BB                      | 0.492 | 0.664 | 0.481 | BB                      | 0.002 | 0.155 | 0.214 |
| Bb                      | 0.642 | 0.330 | 0.746 | Bb                      | 0.199 | 0.071 | 0.022 |
| bb                      | 0.656 | 0.396 | 0.000 | bb                      | 0.081 | 0.122 | 0.135 |
| $h^2 = 0.05, MAF = 0.2$ |       |       |       | $h^2 = 0.05, MAF = 0.4$ |       |       |       |
| Model 22                | AA    | Aa    | aa    | Model 27                | AA    | Aa    | aa    |
| BB                      | 0.499 | 0.639 | 0.765 | BB                      | 0.188 | 0.020 | 0.171 |
| Bb                      | 0.666 | 0.389 | 0.083 | Bb                      | 0.032 | 0.174 | 0.059 |
| bb                      | 0.543 | 0.527 | 0.953 | bb                      | 0.134 | 0.087 | 0.092 |
| $h^2 = 0.05, MAF = 0.2$ |       |       |       | $h^2 = 0.05, MAF = 0.4$ |       |       |       |
| Model 23                | AA    | Aa    | aa    | Model 28                | AA    | Aa    | aa    |
| BB                      | 0.212 | 0.350 | 0.116 | BB                      | 0.005 | 0.179 | 0.251 |
| Bb                      | 0.336 | 0.054 | 0.495 | Bb                      | 0.211 | 0.100 | 0.026 |
| bb                      | 0.227 | 0.273 | 0.495 | bb                      | 0.156 | 0.098 | 0.156 |
| $h^2 = 0.05, MAF = 0.2$ |       |       |       | $h^2 = 0.05, MAF = 0.4$ |       |       |       |
| Model 24                | AA    | Aa    | aa    | Model 29                | AA    | Aa    | aa    |
| BB                      | 0.805 | 0.683 | 0.638 | BB                      | 0.174 | 0.321 | 0.154 |
| Bb                      | 0.657 | 0.936 | 0.989 | Bb                      | 0.223 | 0.254 | 0.245 |
| bb                      | 0.850 | 0.564 | 0.866 | bb                      | 0.448 | 0.025 | 0.424 |
| $h^2 = 0.05, MAF = 0.2$ |       |       |       | $h^2 = 0.05, MAF = 0.4$ |       |       |       |
| Model 25                | AA    | Aa    | aa    | Model 30                | AA    | Aa    | aa    |
| BB                      | 0.638 | 0.488 | 0.383 | BB                      | 0.098 | 0.219 | 0.302 |
| Bb                      | 0.464 | 0.765 | 0.957 | Bb                      | 0.302 | 0.126 | 0.121 |
| bb                      | 0.580 | 0.562 | 0.719 | bb                      | 0.053 | 0.308 | 0.136 |

**Table S5.** Models 31 to 35 without marginal effects when k=2

|                          |       |       |       |
|--------------------------|-------|-------|-------|
| $h^2 = 0.025, MAF = 0.2$ |       |       |       |
| Model 31                 | AA    | Aa    | aa    |
| BB                       | 0.495 | 0.415 | 0.657 |
| Bb                       | 0.429 | 0.616 | 0.121 |
| bb                       | 0.552 | 0.331 | 0.419 |
| $h^2 = 0.025, MAF = 0.2$ |       |       |       |
| Model 32                 | AA    | Aa    | aa    |
| BB                       | 0.592 | 0.691 | 0.743 |
| Bb                       | 0.712 | 0.493 | 0.419 |
| bb                       | 0.580 | 0.746 | 0.504 |
| $h^2 = 0.025, MAF = 0.2$ |       |       |       |
| Model 33                 | AA    | Aa    | aa    |
| BB                       | 0.108 | 0.194 | 0.186 |
| Bb                       | 0.196 | 0.037 | 0.045 |
| bb                       | 0.172 | 0.073 | 0.130 |
| $h^2 = 0.025, MAF = 0.2$ |       |       |       |
| Model 34                 | AA    | Aa    | aa    |
| BB                       | 0.112 | 0.186 | 0.128 |
| Bb                       | 0.193 | 0.024 | 0.138 |
| bb                       | 0.079 | 0.236 | 0.251 |
| $h^2 = 0.025, MAF = 0.2$ |       |       |       |
| Model 35                 | AA    | Aa    | aa    |
| BB                       | 0.272 | 0.192 | 0.185 |
| Bb                       | 0.172 | 0.367 | 0.390 |
| bb                       | 0.345 | 0.069 | 0.005 |

Models 1 to 8, when k=3 that, can be found in files of m1\_Models.txt to

m8\_Models.txt.
